1 **Title: Incorporation of a nucleoside analog maps genome repair sites in post-**  
2 **mitotic human neurons**

3  
4 **Authors:** Dylan A. Reid,<sup>1†</sup> Patrick J. Reed,<sup>1†</sup> Johannes C.M. Schlachetzki,<sup>2‡</sup> Grace Chou,<sup>3‡</sup>  
5 Sahaana Chandran,<sup>4‡</sup> Ake T. Lu,<sup>5</sup> Claire A. McClain,<sup>1</sup> Jean H. Ooi,<sup>1</sup> Jeffrey R. Jones,<sup>1</sup> Sara B.  
6 Linker,<sup>1</sup> Enoch C. Tsui,<sup>1</sup> Anthony S. Ricciardulli,<sup>1</sup> Shong Lau,<sup>1</sup> Simon T. Schafer,<sup>1</sup> Steve  
7 Horvath,<sup>5,6</sup> Jesse R. Dixon,<sup>4</sup> Nasun Hah,<sup>3</sup> Christopher K. Glass,<sup>2</sup> Fred H. Gage<sup>1\*</sup>

8  
9 **Affiliations:**

10 <sup>1</sup>Laboratory of Genetics, The Salk Institute for Biological Studies, 10010 North Torrey Pines  
11 Road, La Jolla, California 92037-1002, USA.

12 <sup>2</sup>Department of Cellular and Molecular Medicine, University of California, San Diego, 9500  
13 Gilman Drive, La Jolla, California 92037-1002, USA.

14 <sup>3</sup>Next Generation Sequencing Core, The Salk Institute for Biological Studies, 10010 North Torrey  
15 Pines Road, La Jolla, California 92037-1002, USA.

16 <sup>4</sup>Clayton Foundation Laboratories for Peptide Biology, The Salk Institute for Biological Studies,  
17 10010 North Torrey Pines Road, La Jolla, California 92037-1002, USA.

18 <sup>5</sup>Department of Human Genetics, David Geffen School of Medicine, University of California Los  
19 Angeles, Los Angeles, California, 90095, USA

20 <sup>6</sup>Department of Biostatistics, School of Public Health, University of California Los Angeles, Los  
21 Angeles, California, 90095, USA

22 \*Correspondence to: [gage@salk.edu](mailto:gage@salk.edu)

23 †These authors contributed equally to this work.

1 ‡These authors contributed equally to this work.

2

3 **One Sentence Summary:**

4       Recurrent DNA repair hotspots in neurons are linked to genes essential for identity and  
5 function.

6

7 **Abstract:**

8       Neurons are the longest-living cells in our bodies, becoming post-mitotic in early  
9 development upon terminal differentiation. Their lack of DNA replication makes them reliant on  
10 DNA repair mechanisms to maintain genome fidelity. These repair mechanisms decline with age,  
11 potentially giving rise to genomic dysfunction that may influence cognitive decline and  
12 neurodegenerative diseases. Despite this challenge, our knowledge of how genome instability  
13 emerges and what mechanisms neurons and other long-lived cells may have evolved to protect  
14 their genome integrity over the human life span is limited. Using a targeted sequencing approach,  
15 we demonstrate that neurons consolidate much of their DNA repair efforts into well-defined  
16 hotspots that protect genes that are essential for their identity and function. Our findings provide a  
17 basis to understand genome integrity as it relates to aging and disease in the nervous system.

18

19 **Main Text:**

20       Neurons are highly specialized post-mitotic cells comprising the major functional cell type  
21 of the central nervous system. While there is a limited capacity to generate new neurons throughout  
22 life, the majority of neurons age in parallel with the organism, making them especially susceptible  
23 to decline from age-related disruptions in cellular homeostasis (1, 2). Neurons must repair  $\sim 10^{4-5}$

1 DNA lesions each day, amounting to more than one billion over the lifespan (3). Deficiencies in  
2 DNA repair pathways have been linked to developmental neurodegenerative disorders (4) and to  
3 genome instability, a primary hallmark of aging often associated with age-related  
4 neurodegenerative diseases (4-7).

5 Early work on genome integrity in neurons suggested that DNA repair was primarily  
6 focused on transcribed genes at the expense of inactive regions of the genome not essential for  
7 neuronal function (8, 9). Accumulation of DNA lesions drives age-associated changes in  
8 transcription that lead to a decline in neuronal function (10, 11). Additionally, neuronal activity  
9 correlates with the generation of DNA double strand breaks (DSBs), potentially contributing to  
10 genomic instability (12, 13). Despite a clear link between genome maintenance and neuronal  
11 health, we know surprisingly little about how neurons maintain genome integrity, as most of our  
12 knowledge comes from studies of mitotic neural progenitor cells or expensive whole genome  
13 sequencing of single neurons to address somatic mosaicism (14-18). Most genomic approaches  
14 require a substantial number of cells for targeted specific DNA lesion detection, limiting their  
15 adoption by the field (14, 19). These technical limitations hamper our ability to define the genome  
16 protection strategies that neurons have evolved to ensure their unique longevity.

17 To better understand genome integrity in neurons, we developed a sequencing method  
18 capable of capturing the genomic locations of all DNA repair based on the incorporation of the  
19 click chemistry nucleoside analog, EdU (5-ethynyl-2'-deoxyuridine). Previous reports have  
20 described the ability of neurons to incorporate radioactive thymidine into their genomes following  
21 DNA damage or under normal resting conditions by DNA repair pathways (20, 21). We confirmed  
22 this to be the case by using single-molecule, localization-based, super-resolution imaging of EdU  
23 in human embryonic stem cell-induced neurons (ESC-iNs) incubated with EdU for 24 hrs (Fig.

1 1A & fig. S1A-B) (22, 23). These neurons have EdU clusters in both the nucleus and cytosol,  
2 where EdU is incorporated into mitochondrial nucleoids during mitochondrial biogenesis. To  
3 define the genomic locations of EdU molecules that had been incorporated into the nuclear genome  
4 of ~500,000 ESC-iNs fed EdU for 24 hrs, we opted to enrich next-generation sequencing libraries  
5 for fragments that contain EdU via click chemistry addition of a biotin epitope (Supplementary  
6 Methods). This strategy is similar to the targeted sequencing of newly synthesized DNA containing  
7 nucleoside analogs to identify the locations of replication forks (24, 25). Our method, termed  
8 “Repair-Seq,” revealed many locations across the neuronal genome that exhibited substantially  
9 more EdU enrichment over comparable whole-genome sequencing to the same depth (Fig. 1B &  
10 fig. S2A-B).

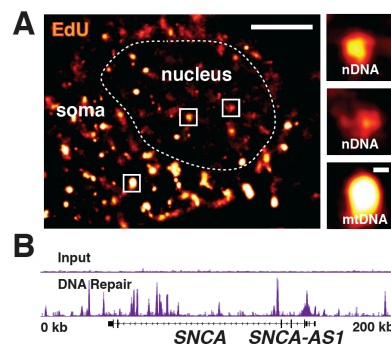

**Fig. 1. EdU incorporated into the genomes of post-mitotic neurons by DNA repair can be mapped by next-generation sequencing.** (A) Representative super-resolution image of ESC-iN nucleus (dashed line) with EdU repair foci and select zoomed regions. Small EdU clusters are evident in the nucleus (nDNA), whereas mitochondrial biogenesis leads to bright mitochondrial nucleoids (mtDNA) in the cell body. (B) DNA repair peaks from the *SNCA* locus in EdU-fed ESC-iNs compared with input genomes sequenced to the same depth show substantial enrichment at some sites. Scale bars are 5 microns and 250 nm respectively.

11 EdU enriched sites appear as well-defined peaks, so we applied a genome peak calling  
12 algorithm to our data, finding ~87,000 total peaks in both H1 and H9 ESC-iNs. We found 61,178  
13 peaks in common for both lines, covering ~1.6% of the genome (fig. S2C-D) (Table S1). As these

1 sites exhibited relative enrichment for DNA repair over the rest of the genome, we termed them  
 2 DNA repair hotspots (DRHs). These DRHs were distributed throughout the genome on all  
 3 chromosomes, and appeared to be enriched in promoters, 5'UTRs, and gene bodies (fig. S2E-F).  
 4 To exhibit such a stable signal in our assay, recurrence across lines and replicates suggests that  
 5 these locations are frequently repaired in the sequenced ESC-iN population. Additionally, our  
 6 approach is not specific for any particular DNA repair pathways, instead capturing a heterogenous  
 7 mix of all repair pathways that are capable of nucleotide incorporation.

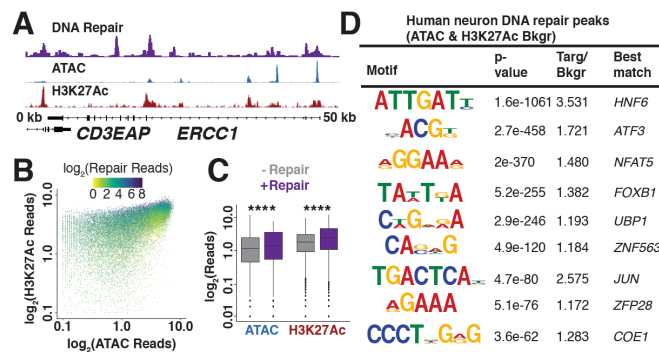

**Fig. 2. Chromatin accessibility controls the placement of DNA repair hotspots.** (A) Repair-, ATAC-, and H3K27Ac ChIP-Seq data at the *ERCC1* locus demonstrate overlap between DNA repair, chromatin accessibility, and histone acetylation. (B) Scatter plot of Repair-Seq normalized read counts compared to ATAC and H3K27Ac normalized read counts. (C) Box plots of ATAC and H3K27Ac peaks with and without DNA repair. (D) DNA sequence motifs identified *de novo* and predicted as enriched in DRHs relative to randomized sequence. \*\*\*\* p-value <2.2e-16 Kruskal-Wallis test.

8 Given the stability and reproducibility of these DRHs, we next sought to define the  
 9 genomic and epigenomic features that could contribute to their establishment in neurons. To map  
 10 the locations of open chromatin and active regulatory regions in our ESC-iNs, we performed  
 11 ATAC-Seq and H3K27Ac ChIP-Seq, respectively, and found that ~23.5% of Repair-Seq common  
 12 peaks were located within these genomic regions (Fig. 2A & fig. S3A-B) (26). This percentage to  
 13 a ~15-fold enrichment over expected associations for repair and these chromatin marks.

1 Intersecting peaks in open regions correlate with greater DNA repair signal strength (Fig. 2B) (27,  
2 28). This conclusion is supported by evidence that ATAC and H3K27Ac sites that intersect with  
3 DRHs have more normalized reads than those lacking repair (Fig. 2C). Additionally, when we  
4 used Repair-Seq peaks as a reference and plot ATAC and H3K27Ac signal intensity, we found  
5 that both of these marks, if not directly overlapping, were proximal to DRHs (fig. S3C). Promoters  
6 were the predominant point of intersection for Repair, ATAC, and H3K27Ac peaks, whereas  
7 DRHs that did not associate with open chromatin were predominantly located in intergenic and  
8 intronic elements of the genome (fig. S3D).

9 To examine the underlying contribution of the genome to the formation of DRHs, we  
10 performed *de novo* DNA sequence motif analysis for all peaks. We identified DNA sequence  
11 motifs, including ones associated with the factors *HNF6*, *ATF3*, *NFAT5*, *FOXB1*, *UBP1*, *ZNF563*,  
12 *JUN*, *ZFP28*, and *COE1* as being significantly enriched in Repair-Seq peaks when taking ATAC  
13 and H3K27Ac peaks as background to correct for the contributions of open chromatin (Fig. 2D &  
14 fig. S3E-F & Table S2). Many of the factors associated with these motifs have roles in specifying  
15 neuronal characteristics (29-31). We next asked if our *de novo* DNA repair-associated motifs were  
16 enriched in genes with DRHs, compared to genes that did not form DHRs, and we found that these  
17 motifs were not enriched in DRH containing genes (fig. S3G). This lack of enrichment suggests  
18 that the establishment of DRHs could occur in other genes and that there might be as yet undefined  
19 “organizing factors” that coordinate sites of recurrent DNA repair in non-dividing cells.

20 Repair-Seq allowed us to directly compare all DNA repair- and transcription-associated  
21 reads. A majority of Repair-Seq reads (~67%) could be assigned to gene bodies using RNA-Seq  
22 pipelines (32), with most of the neuronal transcriptome exhibiting some level of maintenance that  
23 increased with expression (Fig. 3A & fig. S4A-B). This finding is largely in agreement with prior

1 work suggesting that, in neurons, global DNA repair is attenuated and consolidated to actively  
2 transcribed genes, presumably to suppress the accumulation of lesions and mutations (8).  
3 However, when we examined the reads that comprise DRHs (~23% of all repair reads), we  
4 observed that many more genes lacked these recurrent DNA repair sites and we found no  
5 relationship to expression (Fig. 3B & fig. S4C) (Table S3). Almost a third of DRHs were located  
6 in intergenic regions; therefore, we could not readily correlate these with transcription of single  
7 genes. To address the potential contribution of these sites to transcription-associated repair, we  
8 generated Hi-C contact maps for ESC-iNs such that we could assign intergenic peaks to genes  
9 based on features of 3D genome organization, such as Topologically Associating Domains (TADs)  
10 (33). Total DNA repair levels in most TADs were uniform (Fig. 3C). Assignment of intergenic  
11 peaks did not substantially alter the interpretation that DRHs were not correlated with the levels  
12 of gene transcription (Fig. 3D & fig. S6). Comparing the distribution of either all DNA repair-  
13 associated reads or Repair-Seq peaks with genome-wide features of 3D genome organization such  
14 as A/B compartments, we found an enrichment of DNA repair in the “active” A compartment (fig.  
15 S5A-C).

16 We next looked to see if hotspots genes were significantly enriched for specific cellular  
17 processes and found that they were more correlated with genes essential for neuronal identity and  
18 function, irrespective of expression level (ex: *DLG4*, *ARC*, *GRIA4*, *GRIN2B*, *MAP2*, *HOMER1*)  
19 (Fig. 3E & fig. S7) (Table S4). Given that neural genes are typically quite long (34), we explored  
20 whether gene length played a role in DRH density. We compared both total repair and transcription  
21 to gene length and found that they were independent of size (fig. S8A-B). However, when we  
22 examined reads that were only from DRHs in relationship to length, we observed that the total  
23 level of repair in these sites as well as total peak density paradoxically diminished as genes grew

1 larger (Fig. 3F & fig. S8C-D). These findings suggests that DRHs in neural genes might in part  
 2 arise from the specific requirements of maintaining transcriptional elongation and splicing in genes  
 3 containing large introns (35).

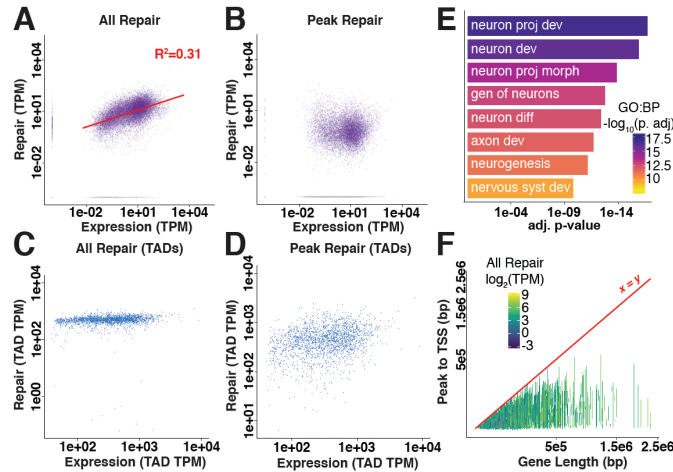

**Fig. 3. Transcriptional output correlates with total DNA repair in genes but not DNA repair hotspots.** (A)

Total DNA repair-associated TPMs (transcripts per kilobase million) from Repair-Seq compared with RNA-associated reads from total RNA-Seq. (B) DNA repair-associated reads from DRHs compared with RNA-associated reads from total RNA-Seq. (C) Total DNA repair-associated reads compared with RNA-associated reads from total RNA-Seq in length-normalized TADs. (D) Peak DNA repair-associated reads compared with RNA-associated reads from total RNA-Seq in length-normalized TADs. (E) Select biological process gene ontology terms for genes containing DRHs. (F) Line plot of transcription start sites (TSS) to DRHs in each gene compared with total gene length (colored by total DNA repair level).

4 Prior reports have suggested that neuronal activity generates DSBs and the associated DNA  
 5 damage marker  $\gamma$ H2AX (phospho-histone H2A.X Ser139) in the promoters of a small subset of  
 6 immediate early genes required for learning and memory to initiate transcription in mice (12, 13).  
 7 We stimulated human ESC-iNs for 30 minutes with 50 mM KCl and allowed them 24 hrs to  
 8 recover in the presence of EdU to label activity-induced DSB sites. A close examination of the  
 9 promoters for activity-related genes suggested that repair occurred there under steady state with  
 10 no change following stimulation and recovery (fig. S9A-B). Therefore, the lack of elevated DNA



1 repair at these sites suggests that there might be some species-specific differences in how these  
2 genes are transcribed (36), that their repair might be highly reliable and not incorporate new  
3 nucleotides, or that the  $\gamma$ H2AX that is associated with activity may not be a reliable marker of  
4 DSBs (37).

5 As cells age, the activity of DNA repair mechanisms declines (38), leading to an increase  
6 in genome instability in the form of information loss via somatic mutations and the accumulation  
7 of unrepaired lesions (18, 39). We compared the locations of somatic single-nucleotide variants  
8 (sSNVs) (40) identified from single neurons isolated from post-mortem humans with the DRHs  
9 we identified in ESC-iNs, and we found that they had negligible overlap (fig. S10A-B). Relative  
10 distance comparison (41) for DRHs showed no proximal enrichment to sSNVs (Fig. 4A & fig.  
11 S10C), suggesting mutations were occurring randomly throughout the genome, irrespective of  
12 repair efforts (42). We were curious as to the relative value of the genetic information that these  
13 DRHs appeared to protect. We used evolutionary conservation based on the genomic evolutionary  
14 rate profiling (GERP) score as a proxy for the relative importance of the underlying sequence (43).  
15 Intriguingly, DRHs often contained a single base pair under strong conservation, whereas  
16 randomly simulated peaks and sSVNs were more likely to be found at sites with negligible  
17 selective pressure (fig. S10D). We next compared the overlap of GERP-identified constrained  
18 elements (CEs) to DRHs, finding that repair was more enriched near CEs than somatic mutations  
19 (Fig. 4B & fig. S10E-F & fig. S11) (44). These data strongly suggest that DRHs protect essential  
20 elements from both erroneous repairs and from going potentially unrepaired.

21 Aging drives fundamental changes in the epigenome – epigenetic drift – that include  
22 alternation of chromatin marks and packaging, as well as changes directly to DNA methylation  
23 patterns (5). Biological age is most often quantified with epigenetic clocks, i.e., changes in the

1 methylation patterns on CG dinucleotides that are calibrated for specific cell and tissue types (45).  
2 Many thousand CG dinucleotides may have statistically significant methylation changes during  
3 aging; however, only a small subset of a few hundred is needed to accurately train a model for  
4 aging. Despite the accuracy of such models, no satisfying biological explanation exists as to why  
5 these DNA modifications are linked to aging (45). We compared the direct overlap of DRHs with  
6 CG dinucleotides from an Illumina Infinium 450K methylation array and found substantial overlap  
7 (fig. S12A). The relative distance to CG dinucleotides and CpG islands was much closer to DRHs  
8 than randomly placed peaks (fig. S12B-C). Using CG dinucleotides that exhibited methylation  
9 changes statistically associated with aging neurons from human prefrontal cortex (46), we found  
10 some direct overlap with DRHs and a closer relative distance than random (fig. S12D-E).

11 Genome instability in the form of DSBs is thought to be a primary driver of biological  
12 aging (47). We treated our neurons with the radiomimetic DNA-damaging agent neocarzinostatin  
13 (NCS) to assay the changes to DRHs following injury. Acute NCS treatment triggered both the  
14 gain and loss of DRHs in neurons in a largely stochastic fashion, though at the dosage used  
15 relatively few peaks demonstrated consistent change (Fig. 4C-D & fig. S12F) (Table S5). In the  
16 context of aging, genome instability would potentially redistribute repair efforts away from  
17 hotspots to other locations in the genome, similar to what we observed with NCS treatment (48).  
18 We compared absolute fold change for NCS-treated samples with statistically significant CG  
19 methylation sites and found that the most stable sites were those most likely to be associated with  
20 the epigenetic clock (Fig. 4E & fig. S12G). Therefore, as DNA repair capacity declines with age,  
21 many of these sites might become less maintained as pathways become overtaxed, and  
22 subsequently more susceptible to changes in methylation status.

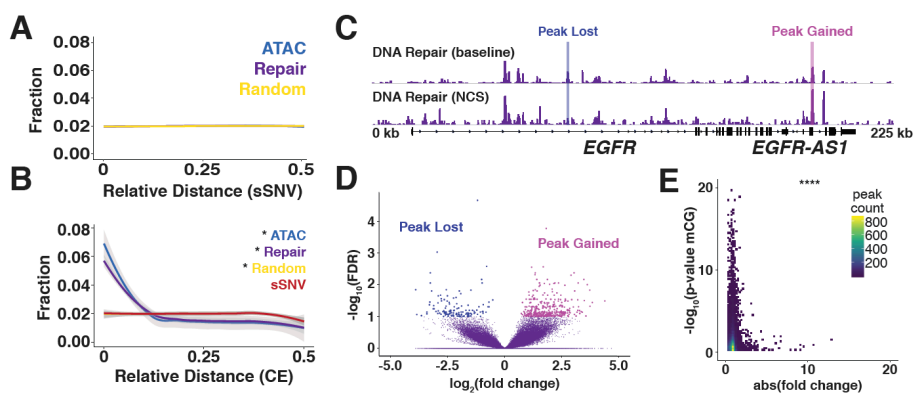

**Fig. 4. DNA repair hotspots protect evolutionarily constrained regions of the human genome from epigenetic drift.** (A) Relative distance measurement from sSNVs identified from whole genome sequencing of single post-mortem human nuclei to nearest DRH or randomly placed peaks. (B) Relative distance measurement from GERP CE to nearest sSNV, DRH, ATAC-Seq peaks, or randomly placed peaks. (C) Representative browser view of DNA repair hotspots at baseline and 24 hrs after 10 min of 10 ng/mL NCS treatment demonstrates that peaks are lost and gained. (D) Volcano plot for NCS differential peaks using FDR <0.1 for DNA repair hotspots from 2 H1 and 2 H9 ESC-iNs samples. (E) Heat map of the stability (absolute fold change) of all DNA repair peaks in NCS-treated neurons compared with CG methylation changes from sorted human neurons. \* p-value<0.01 by Jaccard distance test and \*\*\*\* p<2.47e-17 by hypergeometric test.

1 Collectively, incorporation of the click nucleoside analog EdU into the genome by repair  
 2 polymerases has provided a useful tool to visualize the locations of DNA repair in neurons as well  
 3 as a means to isolate genome fragments and sequence their locations. Our results conclusively  
 4 demonstrate the existence of recurrent DRHs in post-mitotic neurons and suggested that they  
 5 played a key role in neuron identity and function. Going forward, Repair-Seq will be a powerful  
 6 tool to explore how age and disease can disrupt genome integrity in the nervous system. Finally,  
 7 whether DRHs are a unique feature of neuron genome protection, specific developmental lineages,  
 8 non-dividing cells, or are limited to only some long-lived species remains and open question. The  
 9 possible discovery of these sites in other cell types might further aid in our understanding of how

1 age-related changes in their organization could drive differential aging or the development of  
2 disease in other tissue types.

3

#### 4 **References and Notes:**

- 5 1. J. T. Goncalves, S. T. Schafer, F. H. Gage, Adult Neurogenesis in the Hippocampus:  
6 From Stem Cells to Behavior. *Cell* **167**, 897-914 (2016).
- 7 2. M. P. Mattson, T. Magnus, Ageing and neuronal vulnerability. *Nat Rev Neurosci* **7**, 278-  
8 294 (2006).
- 9 3. S. P. Jackson, J. Bartek, The DNA-damage response in human biology and disease.  
10 *Nature* **461**, 1071-1078 (2009).
- 11 4. P. J. McKinnon, Maintaining genome stability in the nervous system. *Nat Neurosci* **16**,  
12 1523-1529 (2013).
- 13 5. C. Lopez-Otin, M. A. Blasco, L. Partridge, M. Serrano, G. Kroemer, The hallmarks of  
14 aging. *Cell* **153**, 1194-1217 (2013).
- 15 6. H. M. Chow, K. Herrup, Genomic integrity and the ageing brain. *Nat Rev Neurosci* **16**,  
16 672-684 (2015).
- 17 7. Y. Hou, H. Song, D. L. Croteau, M. Akbari, V. A. Bohr, Genome instability in Alzheimer  
18 disease. *Mech Ageing Dev* **161**, 83-94 (2017).
- 19 8. T. Nospikel, P. C. Hanawalt, Terminally differentiated human neurons repair  
20 transcribed genes but display attenuated global DNA repair and modulation of repair  
21 gene expression. *Mol Cell Biol* **20**, 1562-1570 (2000).
- 22 9. T. Nospikel, P. C. Hanawalt, DNA repair in terminally differentiated cells. *DNA Repair*  
23 (*Amst*) **1**, 59-75 (2002).
- 24 10. T. Lu *et al.*, Gene regulation and DNA damage in the ageing human brain. *Nature* **429**,  
25 883-891 (2004).
- 26 11. W. P. Vermeij *et al.*, Restricted diet delays accelerated ageing and genomic stress in  
27 DNA-repair-deficient mice. *Nature* **537**, 427-431 (2016).
- 28 12. E. Suberbielle *et al.*, Physiologic brain activity causes DNA double-strand breaks in  
29 neurons, with exacerbation by amyloid-beta. *Nat Neurosci* **16**, 613-621 (2013).
- 30 13. R. Madabhushi *et al.*, Activity-Induced DNA Breaks Govern the Expression of Neuronal  
31 Early-Response Genes. *Cell* **161**, 1592-1605 (2015).
- 32 14. P. C. Wei *et al.*, Long Neural Genes Harbor Recurrent DNA Break Clusters in Neural  
33 Stem/Progenitor Cells. *Cell* **164**, 644-655 (2016).
- 34 15. M. Wang *et al.*, Increased Neural Progenitor Proliferation in a hiPSC Model of Autism  
35 Induces Replication Stress-Associated Genome Instability. *Cell Stem Cell* **26**, 221-233  
36 e226 (2020).
- 37 16. T. Bae *et al.*, Different mutational rates and mechanisms in human cells at pregastrulation  
38 and neurogenesis. *Science* **359**, 550-555 (2018).
- 39 17. M. H. Lee *et al.*, Somatic APP gene recombination in Alzheimer's disease and normal  
40 neurons. *Nature* **563**, 639-645 (2018).
- 41 18. M. A. Lodato *et al.*, Aging and neurodegeneration are associated with increased  
42 mutations in single human neurons. *Science* **359**, 555-559 (2018).

- 1 19. A. Canela *et al.*, DNA Breaks and End Resection Measured Genome-wide by End  
2 Sequencing. *Mol Cell* **63**, 898-911 (2016).
- 3 20. J. R. Sanes, L. M. Okun, Induction of DNA synthesis in cultured neurons by ultraviolet  
4 light or methyl methane sulfonate. *J Cell Biol* **53**, 587-590 (1972).
- 5 21. H. Korr, B. Schultze, Unscheduled DNA synthesis in various types of cells of the mouse  
6 brain in vivo. *Exp Brain Res* **74**, 573-578 (1989).
- 7 22. S. T. Schafer *et al.*, Pathological priming causes developmental gene network  
8 heterochronicity in autistic subject-derived neurons. *Nat Neurosci* **22**, 243-255 (2019).
- 9 23. B. Huang, M. Bates, X. Zhuang, Super-resolution fluorescence microscopy. *Annu Rev*  
10 *Biochem* **78**, 993-1016 (2009).
- 11 24. R. S. Hansen *et al.*, Sequencing newly replicated DNA reveals widespread plasticity in  
12 human replication timing. *Proc Natl Acad Sci U S A* **107**, 139-144 (2010).
- 13 25. J. C. Rivera-Mulia *et al.*, DNA replication timing alterations identify common markers  
14 between distinct progeroid diseases. *Proc Natl Acad Sci U S A* **114**, E10972-E10980  
15 (2017).
- 16 26. J. D. Buenrostro, P. G. Giresi, L. C. Zaba, H. Y. Chang, W. J. Greenleaf, Transposition of  
17 native chromatin for fast and sensitive epigenomic profiling of open chromatin, DNA-  
18 binding proteins and nucleosome position. *Nat Methods* **10**, 1213-1218 (2013).
- 19 27. M. H. Hauer, S. M. Gasser, Chromatin and nucleosome dynamics in DNA damage and  
20 repair. *Genes Dev* **31**, 2204-2221 (2017).
- 21 28. J. Dabin, A. Fortuny, S. E. Polo, Epigenome Maintenance in Response to DNA Damage.  
22 *Mol Cell* **62**, 712-727 (2016).
- 23 29. J. van der Raadt, S. H. C. van Gestel, N. Nadif Kasri, C. A. Albers, ONECUT  
24 transcription factors induce neuronal characteristics and remodel chromatin accessibility.  
25 *Nucleic Acids Res* **47**, 5587-5602 (2019).
- 26 30. D. Hunt, G. Raivich, P. N. Anderson, Activating transcription factor 3 and the nervous  
27 system. *Front Mol Neurosci* **5**, 7 (2012).
- 28 31. S. Maallem, M. Mutin, H. M. Kwon, M. L. Tappaz, Differential cellular distribution of  
29 tonicity-induced expression of transcription factor TonEBP in the rat brain following  
30 prolonged systemic hypertonicity. *Neuroscience* **137**, 51-71 (2006).
- 31 32. R. Patro, G. Duggal, M. I. Love, R. A. Irizarry, C. Kingsford, Salmon provides fast and  
32 bias-aware quantification of transcript expression. *Nat Methods* **14**, 417-419 (2017).
- 33 33. J. R. Dixon *et al.*, Topological domains in mammalian genomes identified by analysis of  
34 chromatin interactions. *Nature* **485**, 376-380 (2012).
- 35 34. M. J. Zylka, J. M. Simon, B. D. Philpot, Gene length matters in neurons. *Neuron* **86**, 353-  
36 355 (2015).
- 37 35. A. Takeuchi *et al.*, Loss of Sfpq Causes Long-Gene Transcriptopathy in the Brain. *Cell*  
38 *Rep* **23**, 1326-1341 (2018).
- 39 36. P. Pruunsild, C. P. Bengtson, H. Bading, Networks of Cultured iPSC-Derived Neurons  
40 Reveal the Human Synaptic Activity-Regulated Adaptive Gene Program. *Cell Rep* **18**,  
41 122-135 (2017).
- 42 37. N. M. Shanbhag *et al.*, Early neuronal accumulation of DNA double strand breaks in  
43 Alzheimer's disease. *Acta Neuropathol Commun* **7**, 77 (2019).
- 44 38. V. Gorbunova, A. Seluanov, Z. Mao, C. Hine, Changes in DNA repair during aging.  
45 *Nucleic Acids Res* **35**, 7466-7474 (2007).

- 1 39. S. Maynard, E. F. Fang, M. Scheibye-Knudsen, D. L. Croteau, V. A. Bohr, DNA  
2 Damage, DNA Repair, Aging, and Neurodegeneration. *Cold Spring Harb Perspect Med*  
3 **5**, (2015).  
4 40. Treated as a 500 base pair window around the called variant  
5

## 6 **Acknowledgments:**

7 The authors would like to thank L. Moore, I. Guimont, and K.E. Diffenderfer, W. Travis  
8 Berggren for technical assistance and M.L. Gage for editorial comments. They would also like to  
9 acknowledge the Salk Institute Stem Cell Core, Waitt Biophotonics Core, and Next Generation  
10 Sequencing Core for technical support. **Funding:** D.A.R. is an Alzheimer's Association  
11 Research Fellow (AARF-17-504089). This work was supported by the American Heart  
12 Association/Paul G. Allen Frontiers Group Brain Health & Cognitive Impairment Initiative  
13 (19PABHI34610000), JPB Foundation, Dolby Charitable Trust, Helmsley Charitable Trust, NIH  
14 AG056306 to F.H.G, NIH R01AG056411-02 to C.K.G, and NIH DP5OD023071-03 to J.R.D.  
15 **Author contributions:** D.A.R. conceived of the project, generated the data, helped analyzed the  
16 results, and supervised the project in coordination with N.H., C.K.G., and F.H.G. Repair- and  
17 RNA-Seq libraries were generated by D.A.R., G.C., C.A.M., J.H.O. ATAC- and ChIP-Seq  
18 experiments were performed by J.C.M.S, and Hi-C experiments were performed by S.C.  
19 Additional experiments and reagents were contributed to the study by J.R.J., A.S.R., E.C.T.,  
20 S.L., S.T.S. Analysis of Repair-, ATAC-, ChIP- and RNA-Seq was performed by P.J.R. and  
21 S.B.L. Analysis of Hi-C was performed by P.J.R. and J.R.D. DNA methylation aging analysis  
22 was performed by A.T.L and S.H. The manuscript was written by D.A.R., P.J.R., and F.H.G, and  
23 edited by J.C.M.S., J.R.J., J.R.D., and C.K.G. **Competing interests:** The authors have filed a  
24 provisional patent pertaining to the detection of DNA repair events in non-dividing cells. **Data**

1 **and materials availability:** Primary data will be made available on GEO upon publication and  
2 is presently available by request.

3

4 **Supplementary Materials:**

5 **References (41-74)**

- 6 41. A normalized metric that described the relative distances between each interval in a set  
7 compared with the two closest intervals of another set.
- 8 42. A. Favorov *et al.*, Exploring massive, genome scale datasets with the GenometriCorr  
9 package. *PLoS Comput Biol* **8**, e1002529 (2012).
- 10 43. E. V. Davydov *et al.*, Identifying a high fraction of the human genome to be under  
11 selective constraint using GERP++. *PLoS Comput Biol* **6**, e1001025 (2010).
- 12 44. Genomic regions under selection to change little with evolution.
- 13 45. S. Horvath, K. Raj, DNA methylation-based biomarkers and the epigenetic clock theory  
14 of ageing. *Nat Rev Genet* **19**, 371-384 (2018).
- 15 46. A. Kozlenkov *et al.*, DNA Methylation Profiling of Human Prefrontal Cortex Neurons in  
16 Heroin Users Shows Significant Difference between Genomic Contexts of Hyper- and  
17 Hypomethylation and a Younger Epigenetic Age. *Genes (Basel)* **8**, (2017).
- 18 47. R. R. White *et al.*, Controlled induction of DNA double-strand breaks in the mouse liver  
19 induces features of tissue ageing. *Nat Commun* **6**, 6790 (2015).
- 20 48. M. Van Meter *et al.*, SIRT6 represses LINE1 retrotransposons by ribosylating KAP1 but  
21 this repression fails with stress and age. *Nat Commun* **5**, 5011 (2014).
- 22 49. S. T. Schafer *et al.*, Pathological priming causes developmental gene network  
23 heterochronicity in autistic subject-derived neurons. *Nat Neurosci* **22**, 243-255 (2019).
- 24 50. D. A. Reid *et al.*, Organization and dynamics of the nonhomologous end-joining  
25 machinery during DNA double-strand break repair. *Proc Natl Acad Sci U S A* **112**,  
26 E2575-2584 (2015).
- 27 51. G. T. Dempsey, J. C. Vaughan, K. H. Chen, M. Bates, X. Zhuang, Evaluation of  
28 fluorophores for optimal performance in localization-based super-resolution imaging. *Nat*  
29 *Methods* **8**, 1027-1036 (2011).
- 30 52. R. Henriques *et al.*, QuickPALM: 3D real-time photoactivation nanoscopy image  
31 processing in ImageJ. *Nat Methods* **7**, 339-340 (2010).
- 32 53. S. S. Rao *et al.*, A 3D map of the human genome at kilobase resolution reveals principles  
33 of chromatin looping. *Cell* **159**, 1665-1680 (2014).
- 34 54. D. Gosselin *et al.*, An environment-dependent transcriptional network specifies human  
35 microglia identity. *Science* **356**, (2017).
- 36 55. A. Nott *et al.*, Brain cell type-specific enhancer-promoter interactome maps and disease-  
37 risk association. *Science* **366**, 1134-1139 (2019).
- 38 56. B. Langmead, S. L. Salzberg, Fast gapped-read alignment with Bowtie 2. *Nat Methods* **9**,  
39 357-359 (2012).
- 40 57. Y. Zhang *et al.*, Model-based analysis of ChIP-Seq (MACS). *Genome Biol* **9**, R137  
41 (2008).

- 1 58. S. Heinz *et al.*, Simple combinations of lineage-determining transcription factors prime  
2 cis-regulatory elements required for macrophage and B cell identities. *Mol Cell* **38**, 576-  
3 589 (2010).
- 4 59. J. T. Robinson *et al.*, Integrative genomics viewer. *Nat Biotechnol* **29**, 24-26 (2011).
- 5 60. A. R. Quinlan, I. M. Hall, BEDTools: a flexible suite of utilities for comparing genomic  
6 features. *Bioinformatics* **26**, 841-842 (2010).
- 7 61. A. Tarasov, A. J. Vilella, E. Cuppen, I. J. Nijman, P. Prins, Sambamba: fast processing of  
8 NGS alignment formats. *Bioinformatics* **31**, 2032-2034 (2015).
- 9 62. H. Li *et al.*, The Sequence Alignment/Map format and SAMtools. *Bioinformatics* **25**,  
10 2078-2079 (2009).
- 11 63. R. C. Gentleman *et al.*, Bioconductor: open software development for computational  
12 biology and bioinformatics. *Genome Biol* **5**, R80 (2004).
- 13 64. W. Huber *et al.*, Orchestrating high-throughput genomic analysis with Bioconductor. *Nat*  
14 *Methods* **12**, 115-121 (2015).
- 15 65. C. S. Ross-Innes *et al.*, Differential oestrogen receptor binding is associated with clinical  
16 outcome in breast cancer. *Nature* **481**, 389-393 (2012).
- 17 66. M. I. Love, W. Huber, S. Anders, Moderated estimation of fold change and dispersion for  
18 RNA-seq data with DESeq2. *Genome Biol* **15**, 550 (2014).
- 19 67. P. Machanick, T. L. Bailey, MEME-ChIP: motif analysis of large DNA datasets.  
20 *Bioinformatics* **27**, 1696-1697 (2011).
- 21 68. T. L. Bailey, DREME: motif discovery in transcription factor ChIP-seq data.  
22 *Bioinformatics* **27**, 1653-1659 (2011).
- 23 69. U. Raudvere *et al.*, g:Profiler: a web server for functional enrichment analysis and  
24 conversions of gene lists (2019 update). *Nucleic Acids Res* **47**, W191-W198 (2019).
- 25 70. R. Patro, G. Duggal, M. I. Love, R. A. Irizarry, C. Kingsford, Salmon provides fast and  
26 bias-aware quantification of transcript expression. *Nat Methods* **14**, 417-419 (2017).
- 27 71. J. R. Dixon *et al.*, Integrative detection and analysis of structural variation in cancer  
28 genomes. *Nat Genet* **50**, 1388-1398 (2018).
- 29 72. N. C. Durand *et al.*, Juicer Provides a One-Click System for Analyzing Loop-Resolution  
30 Hi-C Experiments. *Cell Syst* **3**, 95-98 (2016).
- 31 73. J. R. Dixon *et al.*, Topological domains in mammalian genomes identified by analysis of  
32 chromatin interactions. *Nature* **485**, 376-380 (2012).
- 33 74. N. C. Durand *et al.*, Juicebox Provides a Visualization System for Hi-C Contact Maps  
34 with Unlimited Zoom. *Cell Syst* **3**, 99-101 (2016).
- 35
- 36
- 37
- 38
- 39
- 40



## 1 Figures S1-S12

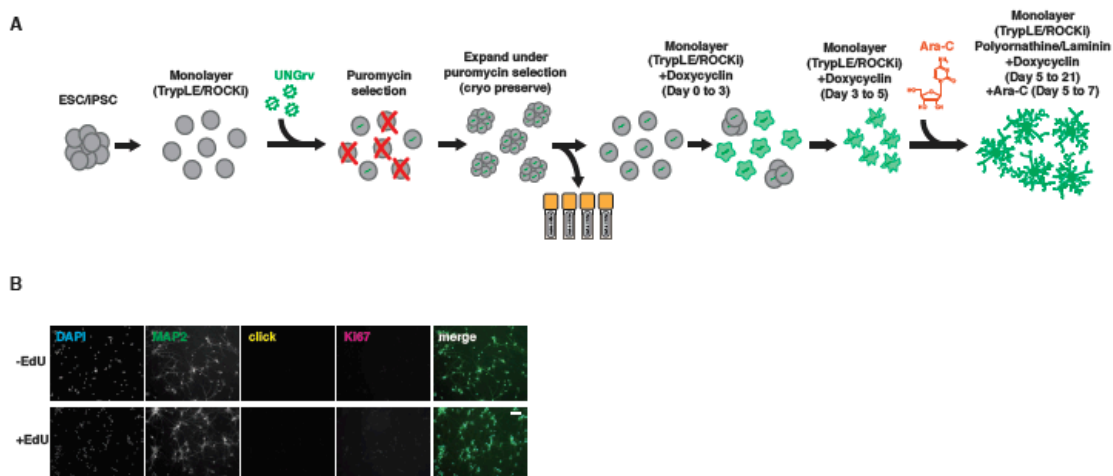

2

3 **fig. S1. Schematic for assembly and sequencing of Repair-Seq libraries.** (A) Schematic for the

4 production of pure ESC-iNs without flow sorting. (B) Representative images of ESC-iNs

5 demonstrate no EdU positive nuclei (fed 24 hrs) and low levels of Ki67 staining (<5%;

6 background) indicate that all cells are non-dividing during this period. Scale bar is 10 microns.

7

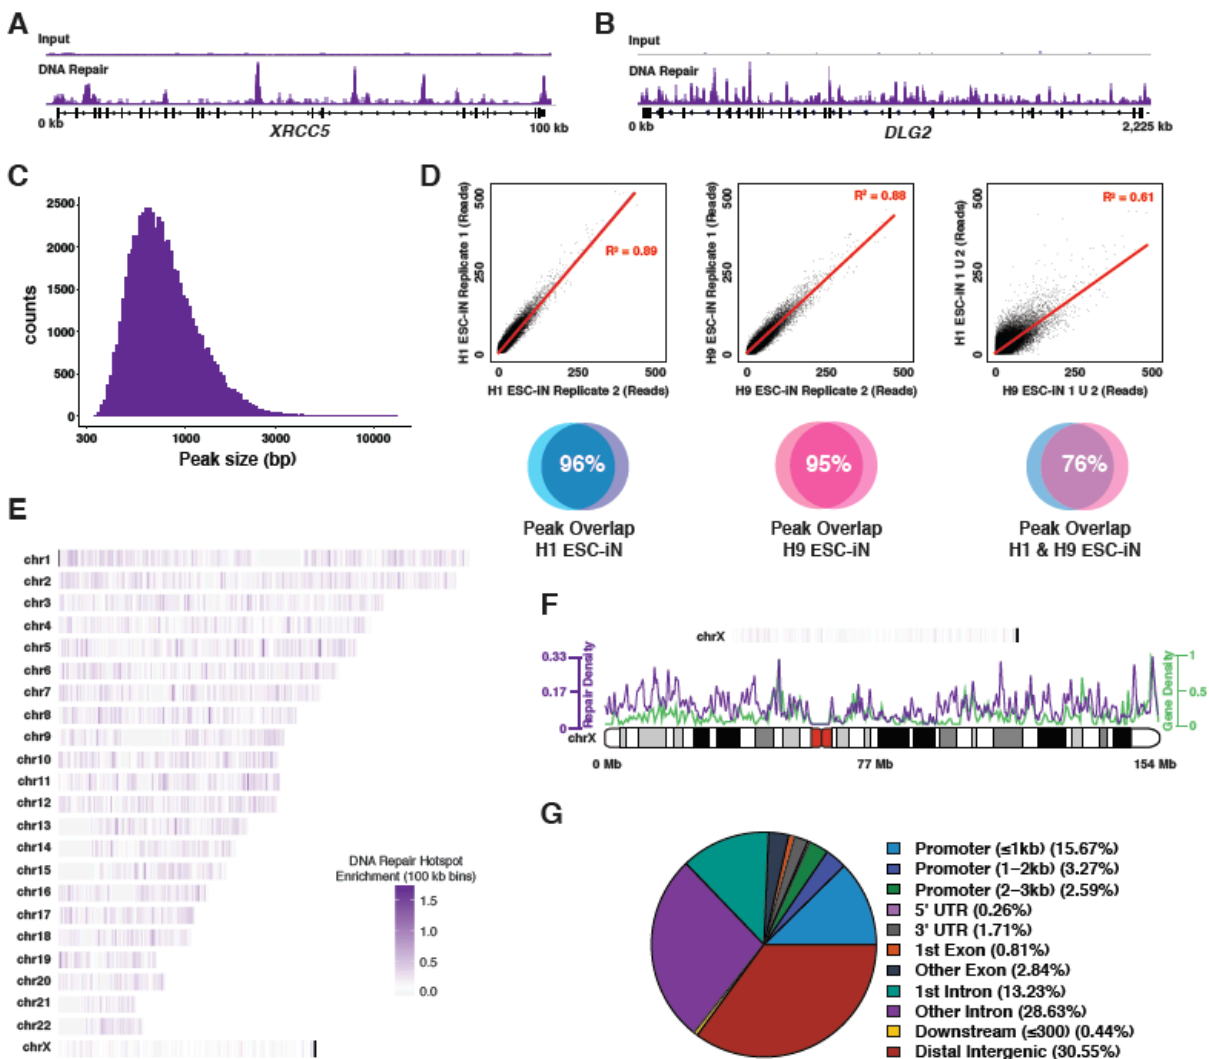

1  
2 **fig. S2. Genomics of stable genome repair hotspots in post-mitotic human neurons.** (A-B)  
3 Further examples of DNA repair hotspots in the *XRCC5* and *DLG2* loci. (C) Histogram of genome  
4 repair hotspot peak widths. (D) Reproducibility of Repair-Seq peaks in normalized read counts for  
5 biological replicates of H1 and H9 ESC-iNs. (E) Genome map of DNA repair hotspots in ESC-  
6 iNs. (F) Detailed view of DNA repair hotspots (purple) and gene density (green) on Chromosome  
7 X. (G) Genome annotations for DNA repair hotspots show distributions primarily in promoters,  
8 gene bodies, and intergenic regions.

9

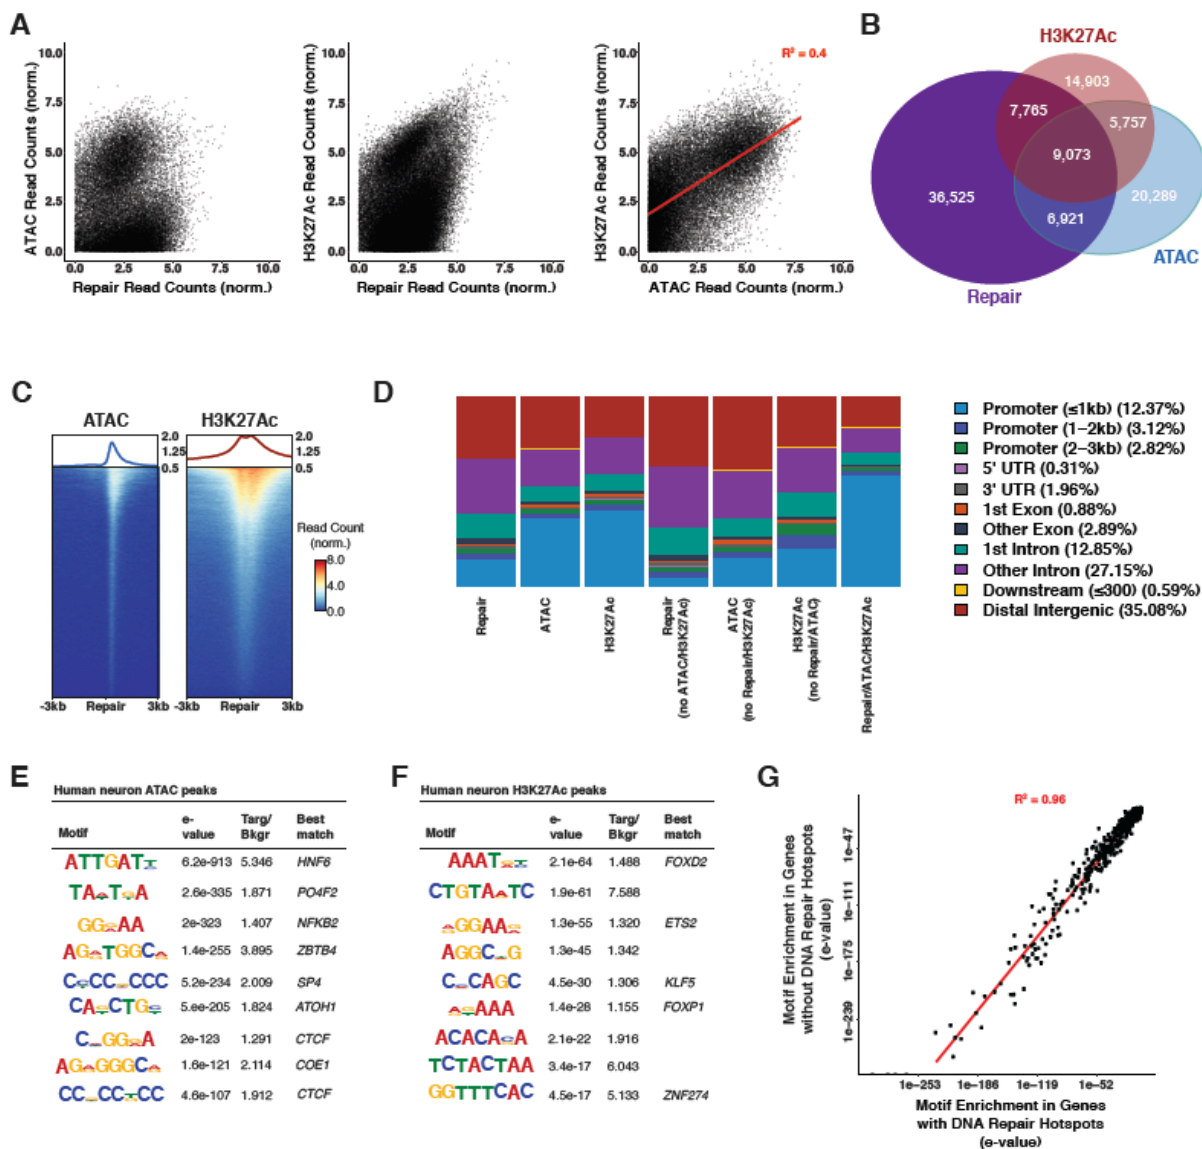

1  
2 **fig. S3. Chromatin accessibility is a primary driver of DNA repair in neurons.** (A) Scatter  
3 plots of Repair-Seq vs ATAC-Seq, Repair-Seq vs H3K27Ac ChIP-Seq and ATAC-Seq vs  
4 H3K27Ac ChIP-Seq. (B) Repair-Seq, ATAC-Seq, and H3K27Ac ChIP-Seq peak overlaps. (C)  
5 TSS plots for ATAC-Seq and H3K27Ac ChIP-Seq peaks centered on nearest Repair-Seq peak.  
6 (D) Genomic annotations for Repair-Seq, ATAC-Seq, H3K27Ac ChIP-Seq peak overlaps. (E)  
7 DNA sequence motifs identified *de novo* in Repair-Seq peaks using all ATAC-Seq peaks as  
8 background. (F) DNA sequence motifs identified *de novo* in Repair-Seq peaks using all H3K27Ac

1   ChIP-Seq peaks as background. (G) Comparison of the enrichment *de novo* DNA sequence motifs  
2   identified in DNA repair hotspots in genes that have hotspots and lack hotspots.

3

4

5

6

7

8

9

10

11

12

13

14

15

16

17

18

19

20

21

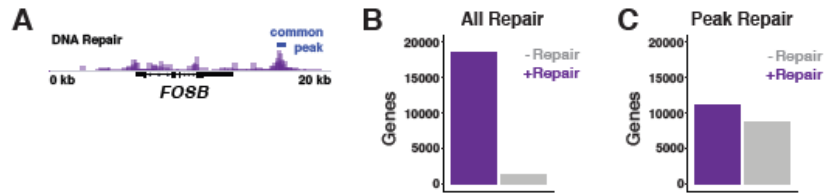

1

2 **fig. S4. Quantification of genes with DNA repair.** (A) DNA repair in *FOSB* locus. (B) Bar plot

3 displaying the number of protein-coding genes that have DNA repair-associated reads. (C) Bar

4 plot displaying the number of protein-coding genes that have DNA repair-associated reads found

5 in DNA repair hotspots.

6

7

8

9

10

11

12

13

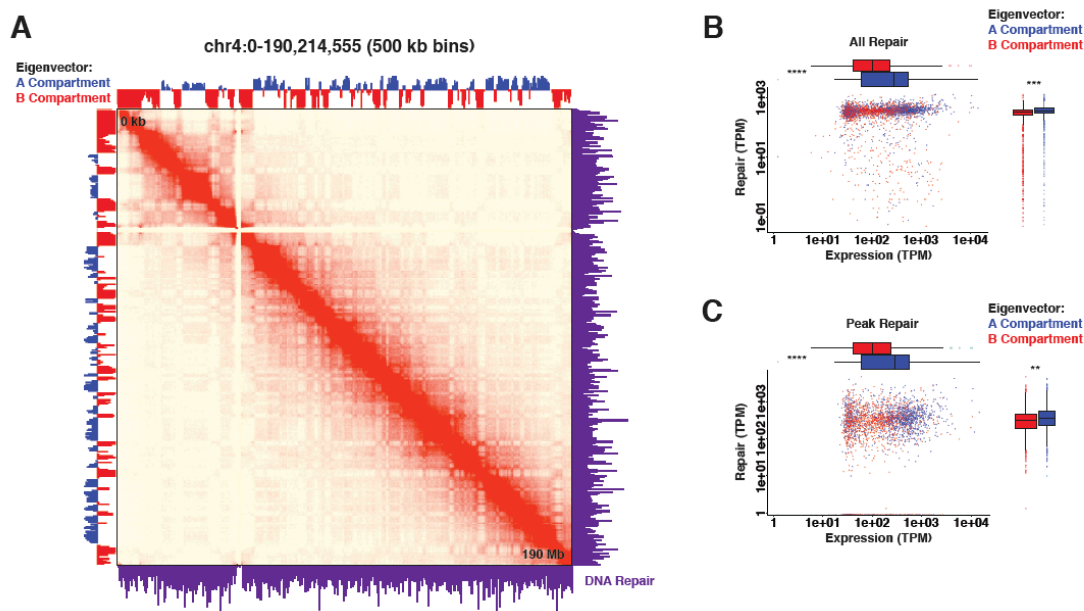

1  
2 **fig. S5. Hi-C A/B compartments are enriched for DNA repair.** (A) Representative Hi-C data  
3 for chromosome 4 displaying eigenvalues corresponding to A/B compartments and DNA repair  
4 from Repair-Seq. (B) Box and scatter plots of all DNA repair associated reads compared with  
5 transcription in Hi-C A/B compartments. (C) Box and scatter plots of all DNA repair peak  
6 associated reads compared with transcription in Hi-C A/B compartments. \*\*\*\* p-value<2.8e-44,  
7 \*\*\* p-value<8.5e-19, \*\* p-value<3.8e-13 by Wilcoxon test.

8

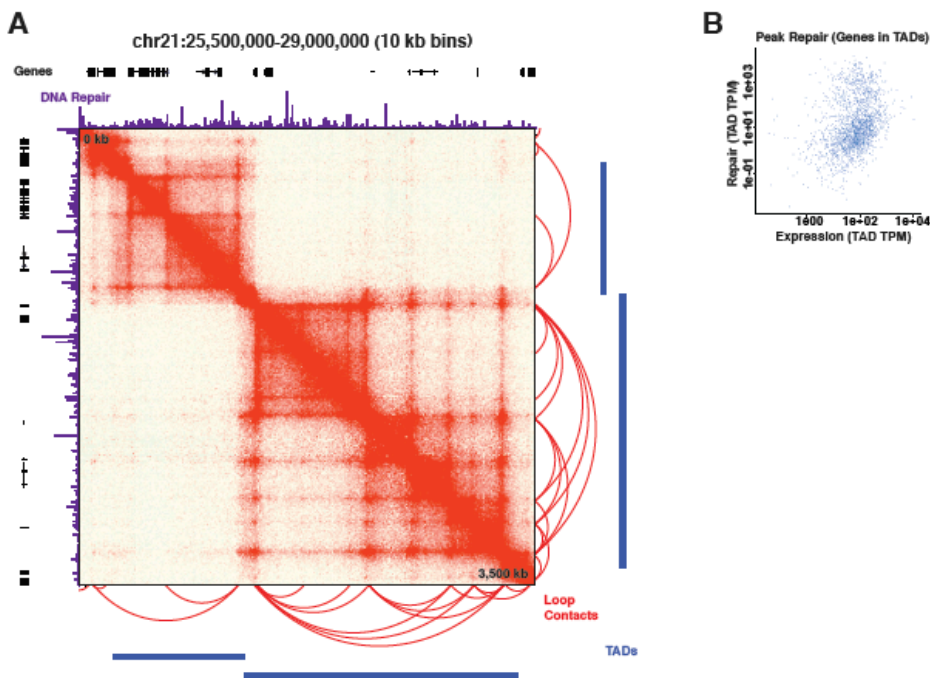

1  
2 **fig. S6. TADs are not preferentially enriched for DNA repair.** (A) Representative Hi-C data  
3 from chromosome 21 displaying loop contacts, TADs, DNA repair and genes. (B) Scatter plot of  
4 DNA repair-associated reads found in SGRHs in genes compared with total expression normalized  
5 to TAD width.

6  
7  
8  
9

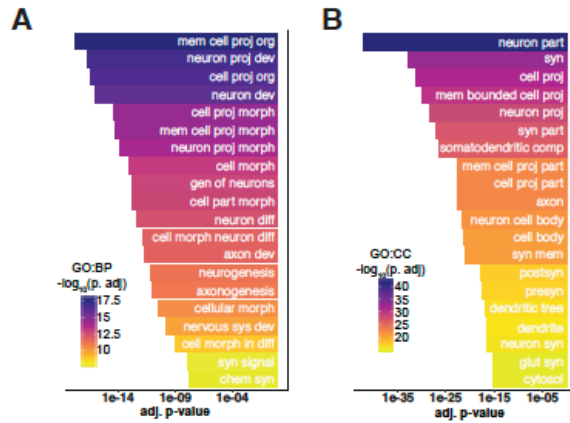

1

2 **fig. S7. Complete GO terms for biological process and cellular component for genes with**

3 **DNA repair hotspots. (A) Top 20 biological process GO terms for genes with SGRHs. (B) Top**

4 **20 cellular component GO terms for genes with SGRHs.**

5

6

7

8

9

10

11

12

13

14

15



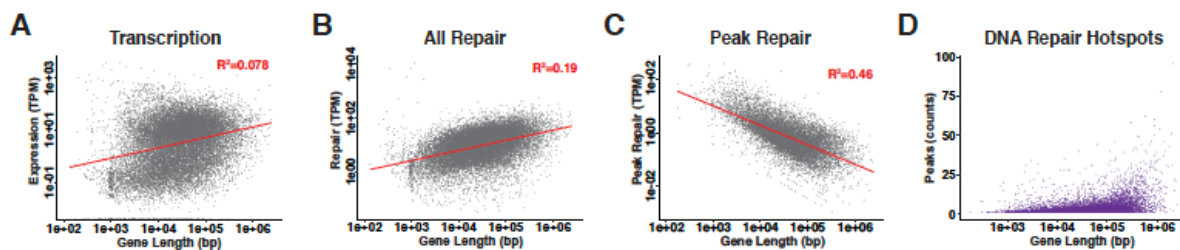

1  
2 **fig. S8. Length dependency of DNA repair hotspots.** (A) Normalized transcription compared  
3 with gene length. (B) Normalized DNA repair compared with gene length. (C) Normalized DNA  
4 repair in peaks compared with gene length. (D) Number of DNA repair hotspots compared with  
5 gene length.

6  
7  
8  
9  
10  
11  
12  
13  
14  
15  
16  
17

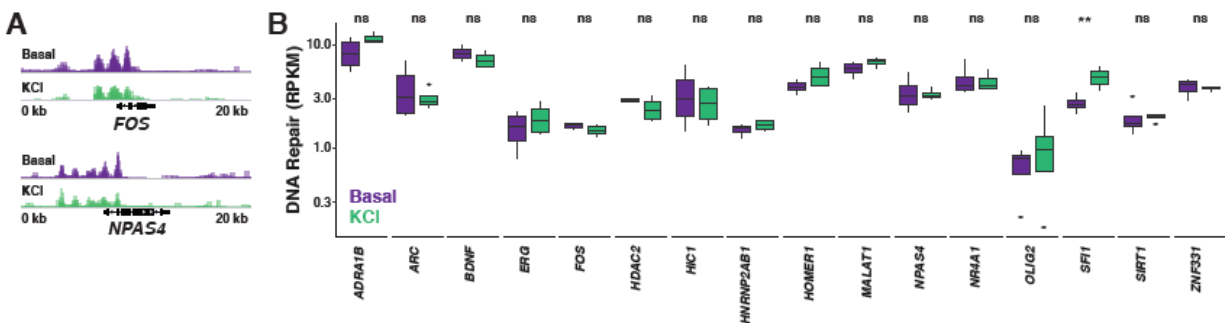

1  
2 **fig. S9. Neuronal depolarization does not increase DNA repair levels in the promoters of**  
3 **immediate early genes.** (A) Promoter region of *FOS* and *NPAS4* loci in basal conditions (purple)  
4 and with the addition of 50 mM KCl for 30 minutes and 24 hr of recovery (green). (B) TPM box  
5 plots for the promoters of genes thought to have activity-induced DSBs found in mouse cortical  
6 neuron culture (*FOS*, *MALAT1*, *NPAS4*, *ERC*, *OLIG2*, *NR4A1*, *HOMER1*, *NR4A3*, *HDAC2*,  
7 *HNRNP2AB1*, *SIRT1*) and human-specific activity-related genes (*BDNF*, *ARC*, *HIC1*, *LINC00473*,  
8 *ZNF331*, *ADRA1B*). \*\* p-value < 0.01 by Wilcoxon test.

9

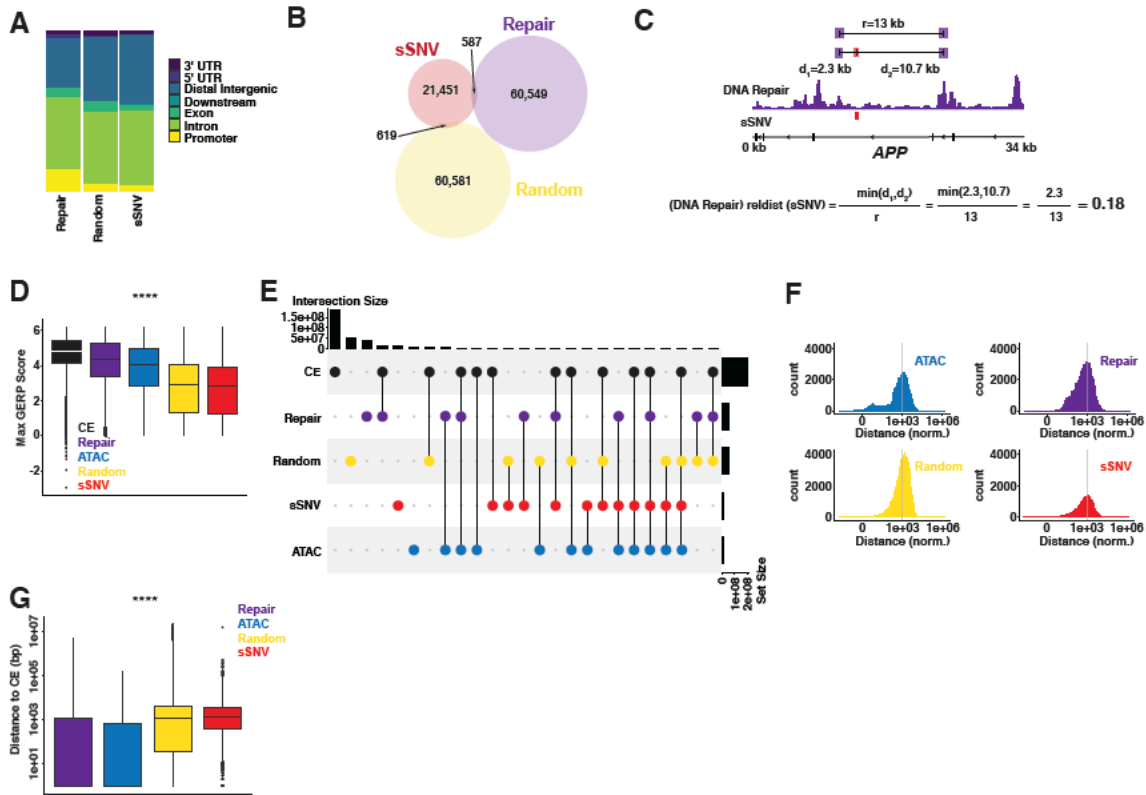

1  
2 **fig. S10. DNA repair hotspots correlate with key genomic regions.** (A) Genomic distributions  
3 of DNA repair hotspots, random peaks, and sSNVs from human neurons. (B) Venn diagram for  
4 overlaps of Repair-Seq peaks with sSNVs and Random peaks with sSNVs. (C) Schematic for  
5 relative distance (reldist) function from bedtools. (D) Max GERP score for CEs, Repair-Seq peaks,  
6 ATAC-Seq peaks, Random peaks, and sSNVs. (E) Upset plot of intersections for CEs, Repair-Seq  
7 peaks, Random peaks, ATAC-Seq peaks, and sSNVs. (F) Interpeak distances for ATAC-Seq  
8 peaks, Repair-Seq peaks, Random peaks, and sSNVs normalized (bp\*peaks/1e6). (G) Box plots  
9 for absolute distances for CE to Repair-Seq peaks, CE to ATAC-Seq peaks, CE to Random peaks,  
10 and CE to sSNVs. \*\*\*\* p-value<2e-16 by one-way ANOVA.

11

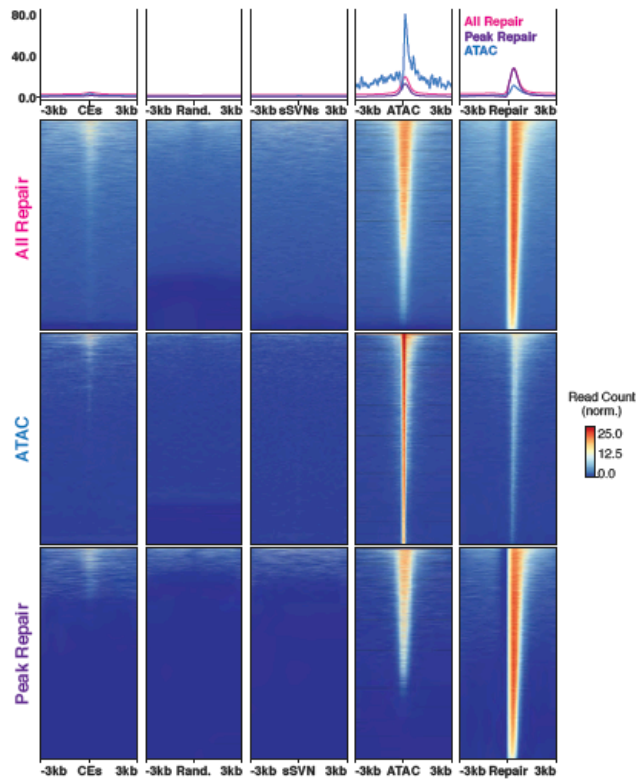

**fig. S11. Heatmaps for All Repair, Peak Repair, and ATAC-Seq.** Heatmaps centered on CEs, Random peaks, sSNVs, ATAC-Seq peaks, and Repair-Seq peaks compared with all Repair-Seq reads, ATAC-Seq peaks, and Repair-Seq peaks.

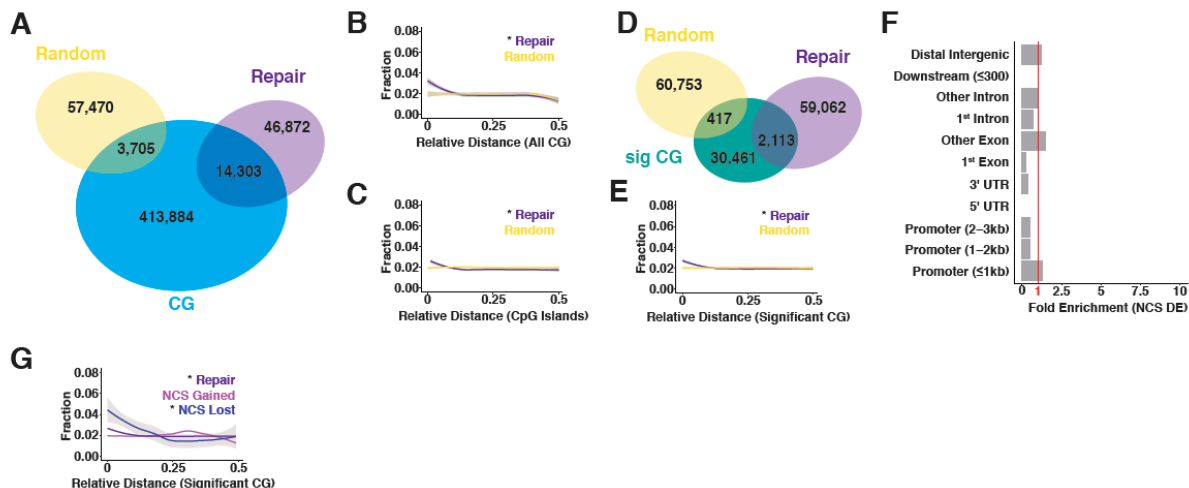

1  
2 **fig. S12. DNA damage and epigenetic drift.** (A) Overlaps between CG dinucleotides on Illumina  
3 Infinium 450K methylation array, Repair-Seq peaks, and Random peaks. (B-C) Relative distance  
4 plot of Repair-Seq and Random peaks to CG dinucleotides from an Illumina Infinium 450K  
5 methylation array and CpG islands in the human genome. (D) Overlaps between CG dinucleotides  
6 that are significantly associated with methylation changes in aging human neurons and Repair-Seq  
7 or Random peaks. (E) Relative distance from significant CG dinucleotides to either Repair-Seq or  
8 Random peaks. (F) NCS peaks that are gained and lost largely at random when normalized to  
9 existing DRHs. (G) Relative distance measurement from NCS gained and lost sites to significant  
10 CG dinucleotides. \* p-value<0.01 by Jaccard distance test.

11  
12  
13  
14  
15  
16  
17
